# Supplementary material
Source: PubMed Central journal article supplement (PMC10098238)
Supplement: 10384_2023_985_MOESM2_ESM.pdf [file 10384_2023_985_MOESM2_ESM.pdf]

## TENAYA and LUCERNE Investigators

| <b>Investigator name<br/>(Previous investigator)</b> | <b>Study site</b>                                                                                            |
|------------------------------------------------------|--------------------------------------------------------------------------------------------------------------|
| <b>TENAYA (NCT03823287)</b>                          |                                                                                                              |
| Wong, David                                          | Unity Health Toronto, Toronto, CA                                                                            |
| Williams, Geoff                                      | Calgary Retina Consultants, Calgary, CA                                                                      |
| Sheidow, Thomas                                      | Ivey Eye Institute, London, CA                                                                               |
| Dollin, Michael                                      | University of Ottawa Eye Institute, Ottawa, CA                                                               |
| Chow, David                                          | Toronto Retina Institute, Toronto, CA                                                                        |
| Maberley, David<br>(Tran, Khoi)                      | University of British Columbia - Vancouver Coastal Health Authority, Vancouver, CA                           |
| Lalonde, Laurent                                     | Institut De L'Oeil Des Laurentides, Boisbriand, CA                                                           |
| Tuli, Raman                                          | The Retina Centre of Ottawa, Ottawa, CA                                                                      |
| Giunta, Michel                                       | Michel Giunta Clinique Medical, Sherbrooke, CA                                                               |
| Agostini, Hansjurgen                                 | Universitätsklinikum Freiburg, Klinik für Augenheilkunde, Freiburg, DE                                       |
| Khoramnia, Ramin                                     | Universitätsklinik Heidelberg; Augenklinik, Heidelberg, DE                                                   |
| Völker, Michael                                      | Universitätsklinikum Tübingen, Tübingen, DE                                                                  |
| Seres, András                                        | Budapest Retina Associates Kft., Budapest, HU                                                                |
| Varsanyi, Balazs                                     | Ganglion Medical Center, Pécs, HU                                                                            |
| Aradi, Etelka                                        | Zala Megyei Kórház; Szemeszet, Zalaegerszeg, HU                                                              |
| Vajas, Attila                                        | Debreceni Egyetem Klinikai Központ; Szemeszeti Klinika, Debrecen, HU                                         |
| Goldstein, Michaella                                 | Tel Aviv Sourasky MC; Ophtalmology, Tel Aviv, IL                                                             |
| Morori-Katz, Haia                                    | Kaplan Medical Center; Ophtalmology, Rehovot, IL                                                             |
| Levy, Jaime                                          | Hadassah MC; Ophtalmology, Jerusalem, IL                                                                     |
| Yoreh, Barak                                         | Rambam Medical Center; Ophthalmology, Haifa, IL                                                              |
| Rosenblatt, Irit                                     | Rabin MC; Ophtalmology, Petach Tikva, IL                                                                     |
| Cagini, Carlo                                        | Azienda Ospedaliera di Perugia Ospedale S. Maria Della Misericordia; Clinica Oculistica, Perugia, IT         |
| Viola, Francesco                                     | Fondazione Irccs Ca' Granda Ospedale Maggiore Policlinico-Clinica Regina Elena; U.O.C Oculistica, Milano, IT |

|                           |                                                                                                             |
|---------------------------|-------------------------------------------------------------------------------------------------------------|
| Parravano, Maria Cristina | Fondazione G.B. Bietti per Lo Studio E La Ricerca in Oftalmologia-Presidio Ospedaliero Britannico, Roma, IT |
| Takahashi, Kanji          | Kansai Medical University Hospital, Osaka, JPN                                                              |
| Murata, Toshinori         | Shinshu University Hospital, Nagano, JPN                                                                    |
| Yoshida, Shigeo           | Kurume University Hospital, Fukuoka, JPN                                                                    |
| Noda, Kousuke             | Hokkaido University Hospital, Hokkaido, JPN                                                                 |
| Iida, Tomohiro            | Tokyo Women's Medical University Hospital, Tokyo, JPN                                                       |
| Okada, Annabelle          | Kyorin University Hospital, Tokyo, JPN                                                                      |
| Hayashi, Ken              | Hayashi Eye Hospital, Fukuoka, JPN                                                                          |
| Kimura, Kazuhiro          | Yamaguchi University Hospital, Yamaguchi, JPN                                                               |
| Sekiryu, Tetsuju          | Fukushima Medical University Hospital, Fukushima, JPN                                                       |
| Sakamoto, Taiji           | Kagoshima University Hospital, Kagoshima, JPN                                                               |
| Nishimura, Tetsuya        | Kansai Medical University Medical Center, Osaka, JPN                                                        |
| Koizumi, Hideki           | University of the Ryukyus Hospital, Okinawa, JPN                                                            |
| Yamashita, Ayana          | Kagawa University Hospital, Kagawa, JPN                                                                     |
| Kaga, Tatsushi            | Chukyo Hospital, Aichi, JPN                                                                                 |
| Imaizumi, Hiroko          | Sapporo City General Hospital, Hokkaido, JPN                                                                |
| Yokouchi, Hirotaka        | Chiba University Hospital, Chiba, JPN                                                                       |
| Kawasaki, Tsutomu         | Ideta Eye Hospital, Kumamoto, JPN                                                                           |
| Ueda, Naoko               | Kyoto University Hospital, Kyoto, JPN                                                                       |
| Mori, Ryusaburo           | Nihon University Hospital, Tokyo, JPN                                                                       |
| Maeno, Takatoshi          | Toho University Sakura Medical Center, Chiba, JPN                                                           |
| Oh, Hideyasu              | Hyogo Prefectural Amagasaki General Medical Center (Hyogo AGMC), Hyogo, JPN                                 |
| Yasuda, Kanako            | Tokyo Medical University Hachioji Medical Center, Tokyo, JPN                                                |
| Mori, Toshio              | Iida Municipal Hospital, Nagano, JPN                                                                        |
| Yoneda, Ai                | Japanese Red Cross Nagasaki Genbaku Hospital, Nagasaki, JPN                                                 |
| Takeuchi, Masaru          | National Defense Medical College Hospital, Saitama, JPN                                                     |
| Matsubara, Hisashi        | Mie University Hospital, Mie, JPN                                                                           |
| Yasukawa, Tsutomu         | Nagoya City University Hospital, Aichi, JPN                                                                 |

|                                |                                                                                                            |
|--------------------------------|------------------------------------------------------------------------------------------------------------|
| Ito, Yasuo                     | Daiyukai Daiichi Hospital, Aichi, JPN                                                                      |
| Mitamura, Yoshinori            | Tokushima University Hospital, Tokushima, JPN                                                              |
| Gomi, Fumi                     | Hyogo Medical University Hospital, Hyogo, JPN                                                              |
| Kobayashi, Namie               | Southern Tohoku Eye Clinic, Fukushima, JPN                                                                 |
| Ikeda, Yasuhiro                | University of Miyazaki Hospital, Miyazaki, JPN                                                             |
| Song, Youngseok                | Asahikawa Medical University Hospital, Hokkaido, JPN                                                       |
| Tanabe, Teruyo                 | Kitano Hospital, Osaka, JPN                                                                                |
| Sawada, Tomoko                 | Shiga University of Medical Science Hospital, Shiga, JPN                                                   |
| Honda, Shigeru                 | Osaka Metropolitan University Hospital, Osaka, JPN                                                         |
| Takeuchi, Jun                  | Nagoya University Hospital, Aichi, JPN                                                                     |
| Kishino, Genichiro             | Kozawa eye hospital and diabetes center, Ibaraki, JPN                                                      |
| Ueda, Tetsuo                   | Nara Medical University Hospital, Nara, JPN                                                                |
| Fujita, Kyoko                  | Aichi Medical University Hospital, Aichi, JPN                                                              |
| Takeuchi, Shinobu              | Takeuchi eye clinic, Tokyo, JPN                                                                            |
| Ramirez Estudillo, Juan        | Centro Oftalmológico Mira, S.C, Del. Cuauhtemoc, MX                                                        |
| Lozano Rechy, David            | Macula Retina Consultores, Mexico, MX                                                                      |
| Montemayor Lobo,<br>Rodrigo    | Montemayor & Asociados (Oftalmologos), Monterrey, MX                                                       |
| Wong, King<br>(Yzer,Suzanne)   | Het Oogziekenhuis Rotterdam, Rotterdam, NL                                                                 |
| Van Lith-Verhoeven,<br>Janneke | ETZ Elisabeth, Tilburg, NL                                                                                 |
| Herba, Ewa                     | Szpital Specjalistyczny nr 1; Oddzial Okulistyki, Bytom, PL                                                |
| Muzyka-Wozniak, Maria          | SPEKTRUM Osrodek Okulistyki Klinicznej, Wroclaw, PL                                                        |
| Nowinska, Anna                 | Gabinet Okulistyczny Prof Edward Wylegala, Katowice, PL                                                    |
| Wowra, Bogumil                 | Szpital sw. Lukasza, Bielsko-Biala, PL                                                                     |
| Oleksy, Piotr                  | Centrum Medyczne Dietla 19 SP. Z O.O., Krakow, PL                                                          |
| Sikorski, Bartosz              | Specjalistyczny Ośrodek Okulistyczny Oculomedica,<br>Bydgoszcz, PL                                         |
| Gawecki, Maciej                | Dobry Wzrok SP Z O O, Gdańsk, PL                                                                           |
| Budzinskaya, Maria             | FSBI “Scientific Research Institute of Eye Diseases” of<br>Russian Academy of medical Sciences, Moscow, RU |
| Kulikov, Alexey                | Medical Military Academy n.a S.M.Kirov, St.Petersburg, RU                                                  |

|                                    |                                                                                            |
|------------------------------------|--------------------------------------------------------------------------------------------|
| Abdulaeva, Elmira                  | Ltd. "Kuzlyar", Kazan, RU                                                                  |
| Garcia-Layana, Alfredo             | Clinica Universitaria de Navarra; Servicio de Oftalmologia, Pamplona, ES                   |
| Ruiz Moreno, Jose Maria            | Hospital Universitario Puerta de Hierro; Servicio de oftalmologia, Majadahonda, ES         |
| Escobar, Joan Josep                | Hospital dos de maig; servicio de oftalmologia, Barcelona, ES                              |
| Gomez Ulla, Francisco              | Instituto Oftalmologico Gomez Ulla; Servicio de Oftalmologia, Santiago De Compostela, ES   |
| Dolz, Rosa                         | Oftalvist Valencia, Valencia, ES                                                           |
| Figuroa, Marta                     | Vissum Madrid; Servicio de oftalmologia, Madrid, ES                                        |
| Sararols, Laura                    | Hospital General de Catalunya; Servicio de oftalmologia, Sant Cugat Del Vallès, ES         |
| Garcia-Layana, Alfredo             | Clinica Universitaria de Navarra; Servicio de Oftalmologia, Pamplona, ES                   |
| Becker, Matthias                   | Stadtspital Triemli; Augenklinik, Zürich, CH                                               |
| Hatz, Katja                        | Vista Klinik Binningen, Binningen, CH                                                      |
| Karabas, Levent                    | Kocaeli Üniversitesi Tıp Fakültesi; Department of Ophthalmology, Kocaeli, TR               |
| Yilmaz, Gursel                     | Ankara Baskent University Medical Faculty; Department of Ophthalmology, Ankara, TR         |
| Ozturk, Banu                       | Selcuk University Faculty of Medicine; Department of Ophthalmology, Konya, TR              |
| Patel, Praveen                     | Moorfields Eye Hospital NHS Foundation Trust, London, UK                                   |
| Gale, Richard                      | The York Hospital, York, UK                                                                |
| Ghanchi, Faruque                   | Bradford Royal Infirmary, Bradford, UK                                                     |
| Lotery, Andrew                     | Southampton General Hospital, Southampton, UK                                              |
| Saedon, Habiba<br>(Mahmood,Sajjad) | Manchester Royal Infirmary, Manchester, UK                                                 |
| Menon, Geeta                       | Frimley Park Hospital, Frimley, UK                                                         |
| Mohamed, Quresh                    | Gloucestershire Royal Hospital, Gloucester, UK                                             |
| Saeed, Usman (Pearce,Ian)          | Royal Liverpool University Hospital; St Paul's Clinical Eye Research Centre, Liverpool, UK |
| Abosedede                          | Bristol Eye Hospital, Bristol, UK                                                          |

|                                         |                                                                     |
|-----------------------------------------|---------------------------------------------------------------------|
| Talks, James                            | Royal Victoria Infirmary, Newcastle Upon Tyne, UK                   |
| Asaria, Riaz                            | Royal Free Hospital, London, UK                                     |
| Downey, Louise                          | Hull Royal Infirmary, Hull, UK                                      |
| Banerjee, Sanjiv                        | University Hospital of Wales, Cardiff, UK                           |
| Narendran, Niro                         | New Cross Hospital, Wolverhampton, UK                               |
| Mukherjee, Raj                          | St James University Hospital, Leeds, UK                             |
| Burgess, Stuart                         | Fort Lauderdale Eye Institute, Plantation, US                       |
| Huddleston, Stephen<br>(Calzada, Jorge) | Charles Retina Institute, Germantown, US                            |
| Campochiaro, Peter                      | Johns Hopkins Med; Wilmer Eye Inst, Baltimore, US                   |
| Carlson, John                           | Retina Consultants of Southern California, Redlands, US             |
| Chan, Clement                           | Southern CA Desert Retina Cons, Palm Desert, US                     |
| Chang, Emmanuel                         | Retina & Vitreous of Texas, Houston, US                             |
| Brown, Jamin<br>(Hampton, Robert)       | Retina Vit Surgeons/Central NY, Liverpool, US                       |
| Hershberger, Vrinda                     | Florida Eye Associates, Melbourne, US                               |
| Higgins, Patrick                        | Retina Center of New Jersey, Bloomfield, US                         |
| Holekamp, Nancy                         | Midwest Vision Research Foundation, Chesterfield, US                |
| Chao, Daniel                            | Jacobs Retina center at the Shiley eye Institute UCSD, La Jolla, US |
| Chaudhry, Nauman                        | Retina Group of New England, Waterford, US                          |
| Cheek, Andrew                           | Spokane Eye Clinical Research, Spokane, US                          |
| Rich, Ryan<br>(Chittum, Mark)           | Retina Consultants of Southern, Colorado Springs, US                |
| Connolly, Brian                         | Retina Assoc of Western NY, Rochester, US                           |
| Abbey, Ashkan                           | Texas Retina Associates, Dallas, US                                 |
| Graff, Jordan                           | Barnet Dulaney Perkins Eye Center, Mesa, US                         |
| Alfaro, Virgil                          | Charleston Neuroscience Inst, Ladson, US                            |
| Danzig, Carl                            | Rand Eye, Deerfield Beach, US                                       |
| Dessouki, Amr                           | Retinal Diagnostic Center, Campbell, US                             |
| Itty, Sujit (Dugel, Pravin)             | Retinal Research Institute, LLC, Phoenix, US                        |
| Eichenbaum, David                       | Retina Vitreous Assoc of FL, Saint Petersburg, US                   |

|                                            |                                                                    |
|--------------------------------------------|--------------------------------------------------------------------|
| Engstrom, Robert                           | The Retina Partners, Encino, US                                    |
| Faber, David W.                            | Rocky Mountain Retina, Salt Lake City, US                          |
| Falk, Naomi                                | The Retina Consultants, Slingerlands, US                           |
| Feiner, Leonard                            | Retina Associates of NJ, Teaneck, US                               |
| Ferrone, Philip                            | Long Is. Vitreoretinal Consult, Great Neck, US                     |
| Shah, Sumit<br>(Fine,Howard)               | New Jersey Retina Research Foundation, Edison, US                  |
| Fox, Gregory M.                            | Retina Associates, Shawnee Mission, US                             |
| Gasperini, Julie                           | South Coast Retina Center, Long Beach, US                          |
| Gill, Manjot                               | Northwestern Medical Group/Northwestern University,<br>Chicago, US |
| Glaser, David                              | Retina Associates of St. Louis, Florissant, US                     |
| Gonzalez, Victor                           | Valley Retina Institute P.A., Mcallen, US                          |
| Gupta, Sunil                               | Retina Specialty Institute, Pensacola, US                          |
| Javid, Cameron                             | Retina Associates Southwest PC, Tucson, US                         |
| Kelty, Patrick<br>(Williams,Thomas)        | Graystone Eye, Hickory, US                                         |
| Almony, Arghavan                           | Carolina Eye Associates, Southern Pines, US                        |
| Amini, Payam                               | California Eye Specialists, Pasadena, US                           |
| Antoszyk, Andrew                           | Char Eye Ear &Throat Assoc, Charlotte, US                          |
| Khanani, Arshad                            | Sierra Eye Associates, Reno, US                                    |
| Patel, Apurva<br>(Dreyer, Richard)         | Retina Northwest, Portland, US                                     |
| London, Nikolas                            | Retina Consultants, San Diego, Poway, US                           |
| Awh, Carl C.                               | Tennessee Retina PC., Nashville, US                                |
| Baumal, Caroline                           | Tufts Medical Center; Ophthalmology, Boston, US                    |
| Reilly, Gayatri                            | Retina Group of Washington, Chevy Chase, US                        |
| Bridges, Jr.,William Z<br>(Stone, Cameron) | Western Carolina Retinal Associate PA, Asheville, US               |
| Lindsell, Lucas<br>(Sisk, Robert)          | Cincinnati Eye Institute, Cincinnati, US                           |
| Brown, David M.                            | Retina Consultants of Houston, Houston, US                         |
| Stoller, Glenn                             | Ophthalmic Cons of Long Island, Oceanside, US                      |

|                                    |                                                                              |
|------------------------------------|------------------------------------------------------------------------------|
| Yiu, Glenn                         | University of California, Davis, Eye Center, Sacramento, US                  |
| Abraham, Prema                     | Black Hills Eye Institute, Rapid City, US                                    |
| Margherio, Alan                    | Associated Retinal Consultants, Grand Rapids, US                             |
| Mehta, Sonia                       | Mid Atlantic Retina - Wills Eye Hospital, Philadelphia, US                   |
| <b>LUCERNE (NCT03823300)</b>       |                                                                              |
| Schlottmann, Patricio              | Organizacion Medica De Investigacion, Capital Federal, AR                    |
| Alezzandrini, Arturo               | Oftalmos, Captial Federal, AR                                                |
| Furno Sola, Federico               | Grupo Laser Vision, Rosario, AR                                              |
| Zambrano, Alberto                  | Fundacion Zambrano, Caba, AR                                                 |
| Zeolite, Carlos                    | Oftar, Mendoza, AR                                                           |
| Saravia, Mario                     | Diagnóstico Ocular, Capital Federal, AR                                      |
| Franco, Pablo                      | Centro Oftalmológico Dr. Charles S.A., Capital Federal, AR                   |
| Arnold, Jennifer                   | Marsden Eye Research Centre, Parramatta, AUS                                 |
| Chang, Andrew                      | Sydney Retina Clinic and Day Surgery, Sydney, AUS                            |
| Fraser-Bell, Samantha              | Sydney Eye Hospital, Sydney, AUS                                             |
| Sandhu, Sukhpal<br>(Guymer, Robyn) | Centre For Eye Research Australia, East Melbourne, AUS                       |
| Luckie, Alan                       | Eyeclinic Albury Wodonga, Albury, AUS                                        |
| Balaratnasingam, Chandra           | The Lions Eye Institute, Nedlands, AUS                                       |
| Mitchell, Paul                     | Sydney West Retina, Westmead, AUS                                            |
| Wong, James                        | Strathfield Retina Clinic, Rowville, AUS                                     |
| Wickremasinghe,<br>Sanjeewa        | Retina Specialists Victoria, Rowville, AUS                                   |
| Sacu, Stefan                       | Medizinische Universität Wien, Wien, AT                                      |
| Haas, Anton                        | Universitäts-Augenklinik, Graz, AT                                           |
| Belfort Jr., Rubens                | Universidade Federal de Sao Paulo, Sao Paulo, BR                             |
| Taleb, Alexandre                   | Hospital de Olhos de Aparecida, Aparecida de Goiania, BR                     |
| Petkova, Iva                       | Specialized Hospital for Active Treatment of Eye Diseases<br>Zora, Sofia, BG |
| Daskalov, Vesselin                 | Pentagram Eye Hospital, Sofia, BG                                            |
| Larsen, Michael                    | Glostrup Hospital, Glostrup, DK                                              |
| Sørensen, Torben L.                | Sjællands Universitetshospital, Roskilde, DK                                 |

|                               |                                                                               |
|-------------------------------|-------------------------------------------------------------------------------|
| Cornut, Pierre Loic           | Pole Vision Val d'Ouest, Ecully, FR                                           |
| Devin, Francois               | Centre Paradis Monticelli, Marseille, FR                                      |
| Francais, Catherine           | Centre Odeon; Exploration Ophtalmologique, Paris, FR                          |
| Tadayoni, Ramin               | Hopital Lariboisiere; Ophtalmologie, Paris, FR                                |
| Masse, Helene                 | CHU Nantes - Hôtel Dieu; Ophthalmology, Nantes, FR                            |
| Buffet, Sylvia                | Centre Ophtalmologique; Imagerie et laser, Paris, FR                          |
| Kodjikian, Laurent            | Hopital de la croix rousse; Ophtalmologie, Lyon, FR                           |
| Souied, Eric                  | Chi De Creteil; Ophtalmologie, Creteil, FR                                    |
| Razavi, Hessam                | Centres Ophtalmologique St Exupéry; Ophtalmologie, St Cyr Sur Loire, France   |
| Altay, Lebriz                 | Universitätsklinikum Köln, Köln, DE                                           |
| Eter, Nicole                  | Universitätsklinikum Münster, Münster, DE                                     |
| Guthoff, Rainer               | Universitätsklinikum Düsseldorf, Düsseldorf, DE                               |
| Pauleikhoff, Daniel           | Augenabteilung am St. Franziskus-Hospital, Munster, DE                        |
| Lai, Timothy                  | Hong Kong Eye Hospital, Mongkok, Hong Kong, CN                                |
| Fung, Nicholas<br>(Wong, Ian) | Queen Mary Hospital; Department of Ophthalmology,<br>Aberdeen, Hong Kong, CN  |
| Toth-Molnar, Edit             | Szegedi Tudományegyetem ÁOK, Szeged, HU                                       |
| Kerenyi, Agnes                | Bajcsy-Zsilinszky Hospital, Budapest, HU                                      |
| Vogt, Gábor                   | Magyar Honvedseg Egeszsegugyi Kozpont, Budapest, HU                           |
| Staurenghi, Giovanni          | Asst Fatebenefratelli Sacco, Milano, IT                                       |
| Ricci, Federico               | Fondazione PTV Policlinico Tor Vergata Di Roma, Rome, IT                      |
| Nicolo, Massimo               | Universita Degli Studi Di Genova, Genova, IT                                  |
| Virgili, Gianni               | Azienda Ospedaliero-Universitaria Careggi, Firenze, IT                        |
| Lanzetta, Paolo               | A.O. Universitaria S. Maria Della Misericordia Di Udine,<br>Udine, IT         |
| Nardi, Marco                  | Nuovo Ospedale S. Chiara - A.O.U.P Presidio, Pisa, IT                         |
| Yu, HyeongGon                 | Seoul National University Hospital, Seoul, Republic of Korea                  |
| Yoon, Young Hee               | Asian Medical Center, Seoul, Republic of Korea                                |
| Park, Kyu Hyung               | Seoul National University Bundang Hospital, Gyeonggi-do,<br>Republic of Korea |
| Kang, Se Woong                | Samsung Medical Center, Seoul, Republic of Korea                              |



|                                   |                                                                                                                            |
|-----------------------------------|----------------------------------------------------------------------------------------------------------------------------|
| Yu, Seung Young                   | Kyung Hee University Hospital, Seoul, Republic of Korea                                                                    |
| Lee, Won Ki                       | Nune Eye Hospital, Seoul, Republic of Korea                                                                                |
| Byon, Iksoo (Lee, Ji Eun)         | Pusan National University Hospital, Busan, Republic of Korea                                                               |
| Sagong, Min                       | Yeungnam University Medical Center, Daegu, Republic of Korea                                                               |
| Raczynska, Dorota                 | Optimum Profesorskie Centrum, Gdansk, PL                                                                                   |
| Kaluzny, Jakub                    | Oftalmika, Bydgoszcz, PL                                                                                                   |
| Zatorska, Barbara                 | Caminomed, Tarnowskie Gory, PL                                                                                             |
| Romanowska-Dixon, Bożena          | SP ZOZ Szpital Uniwersytecki w Krakowie Oddział Kliniczny Okulistyki i Onkologii Okulistycznej, Krakow, PL                 |
| Carneiro, Angela                  | Hospital de Sao Joao, Porto, PT                                                                                            |
| Silva, Rufino                     | Centro Hospitalar E Universitário de Coimbra EPE - Serviço Oftalmologia, Coimbra, PT                                       |
| Yurieva, Tatiana                  | Intersec. Research and Technology Complex Eye Microsurgery n a Fyodorov Irkutsk branch, Irkutsk, Russian Federation        |
| Astakhov, Sergei (Astakhov, Yury) | Saint-Petersburg St. Med. University, Saint Petersburg, Russian Federation                                                 |
| Bratko, Galina                    | Intersec Research and Technology Complex Eye Microsurgery n a Fyodorov Novosibirsk Branch, Novosibirsk, Russian Federation |
| Pozdeyeva, Nadezhda               | Intersec Research and Technology Complex Eye Microsurgery n a Fyodorov Novosibirsk Branch, Cheboksary, Russian Federation  |
| Chee, Caroline                    | National University Hospital, Singapore, SG                                                                                |
| Cheung, Gemmy                     | Singapore Eye Research Institute, Singapore, SG                                                                            |
| Arias, Luis                       | Hospital Universitario de Bellvitge, Barcelona, ES                                                                         |
| Fernandez Vega, Alvaro            | Instituto Oftalmologico Fernandez Vega, Asturias, ES                                                                       |
| Mones, Jordi                      | Institut de la Macula i la retina, Barcelona, ES                                                                           |
| Montero, Javier                   | Hospital Universitario Rio Hortega, Valladolid, ES                                                                         |
| Adan Civera, Alfredo              | Hospital Clinic de Barcelona, Barcelona, ES                                                                                |
| Pablo, Luis                       | Hospital Universitario Miguel Servet, Zaragoza, ES                                                                         |
| Chen, Shih-Jen                    | Taipei Veterans General Hospital, Taipei, TW                                                                               |

|                                           |                                                                                                            |
|-------------------------------------------|------------------------------------------------------------------------------------------------------------|
| Lai, Chi-Chun                             | Chang Gung Medical Foundation – Linkou, Taoyuan, TW                                                        |
| Chen, San-Ni                              | Changhua Christian Hospital, Changhua, Taiwan                                                              |
| Sermet, Figen                             | Ankara University Medical Faculty, Ankara, TR                                                              |
| Ozdek, Sengul                             | Gazi University Faculty of Medicine, Ankara, TR                                                            |
| Eldem, Bora                               | Hacettepe University Medical Faculty, Ankara, TR                                                           |
| Mentes, Jale                              | Ege University Medical Faculty, Izmir, TR                                                                  |
| Parke, D. Wilki                           | Vitreoretinal Surgery, Minneapolis, USA                                                                    |
| Patel, Sunil                              | Retina Res Institute of Texas, Abilene, USA                                                                |
| Patel, Sugat                              | Midwest Retina, Dublin, USA                                                                                |
| Pearlman, Joel                            | Retinal Consultants Med Group, Sacramento, USA                                                             |
| Couvillion, Stephen<br>(Pieramici, Dante) | California Retina Consultants, Santa Barbara, USA                                                          |
| Qureshi, Jawad                            | Retina Center of Texas, Grapevine, USA                                                                     |
| Rathod, Rajiv                             | Orange County Retina Med Group, Santa Ana, USA                                                             |
| Fineman, Mitchell<br>(Regillo, Carl)      | Mid Atlantic Retina - Wills Eye Hospital. Cherry Hill, USA                                                 |
| Heier, Jeffrey                            | Ophthalmic Consultants of Boston, Boston, USA                                                              |
| Kwun, Robert<br>(Howard, James)           | Retina Associates of Utah, Murray, USA                                                                     |
| Javey, Golnaz                             | Piedmont Eye Center, Lynchburg, USA                                                                        |
| Makkouk, Fuad<br>(Chexal, Saradha)        | Retina Research Center, Austin, USA                                                                        |
| Kapoor, Kapil                             | Wagner Macula & Retina Center, Norfolk, USA                                                                |
| Kwong, Henry<br>(Klein-Mascia, Kendra)    | Associated Retina Consultants, Phoenix, USA                                                                |
| Schadlu, Ramin                            | Arizona Retina and Vitreous Consultants, Phoenix, USA                                                      |
| Shah, Rohan<br>Shah, Ankur                | Southeastern Retina Associates Chattanooga, Chattanooga,<br>USA<br>Prairie Retina Center, Springfield, USA |
| Sheth, Veeral                             | University Retina and Macula Associates, Oak Forest, USA                                                   |
| Singerman, Lawrence                       | Retina Assoc of Cleveland Inc, Cleveland, USA                                                              |
| Spinak, David-J                           | Retina Center Northwest, Silverdale, USA                                                                   |
| Kokame, Gregg                             | Retina Consultants of Hawaii, Aiea, USA                                                                    |

|                                   |                                                                    |
|-----------------------------------|--------------------------------------------------------------------|
| Steinmetz, Robert                 | Southern Vitreoretinal Assoc, Tallahassee, USA                     |
| Stoltz, Robert                    | Georgia Retina PC, Marietta, USA                                   |
| Suan, Eric                        | The Retina Care Center, Baltimore, USA                             |
| Suner, Ivan                       | Retina Associates of Florida, LLC, Tampa, USA                      |
| Thompson, John                    | Retina Specialists, Baltimore, USA                                 |
| Uchiyama, Eduardo                 | Retina Group of Florida, Ft Lauderdale, USA                        |
| Warrow, David<br>(Hu, Allen)      | Cumberland Valley Retina PC, Hagerstown, USA                       |
| Weber, Pamela                     | Island Retina, Shirley, USA                                        |
| Wells, John A.                    | Palmetto Retina Center, West Columbia, USA                         |
| Wieland, Mark<br>(Khurana, Rahul) | Northern California Retina Vitreous Associates, Mountain View, USA |
| Wong, Robert                      | Austin Retina Associates, Austin, USA                              |
| Wykoff, Charles C.                | Retina Consultants of Houston, The Woodlands, USA                  |
| Lavina, Adrian<br>(Michels, Mark) | Retina Care Specialists, Palm Beach Gardens, USA                   |
| Lee, Seong                        | Strategic Clinical Research Group, LLC, Willow Park, USA           |
| Liu, Mimi                         | Colorado Retina Associates, PC, Golden, USA                        |
| Marcus, Dennis                    | Southeast Retina Center, Augusta, USA                              |
| Maturi, Raj                       | Raj K. Maturi, MD PC, Indianapolis, USA                            |
| Moore, Jeffrey                    | Maine Eye Center, Portland, USA                                    |
| Nielsen, Jared                    | Wolfe Eye Clinic, West Des Moines, USA                             |
| Ohr, Matthew                      | The Ohio State University Havener Eye Institute, Columbus, USA     |
